# Supplementary material for: Myofiber Baf60c controls muscle regeneration by modulating Dkk3-mediated paracrine signaling
Source: PubMed Central journal article supplement — J Exp Med. 2023 Jun 7;220(9):e20221123. doi: 10.1084/jem.20221123 (PMC10250555; doi:10.1084/jem.20221123), 2023-06-07

**Fig. 2. Baf60c inactivation in myocytes may regulate muscle stem cell regeneration by increasing the expression and secretion of Dkk3.**

**Fig. 2d**

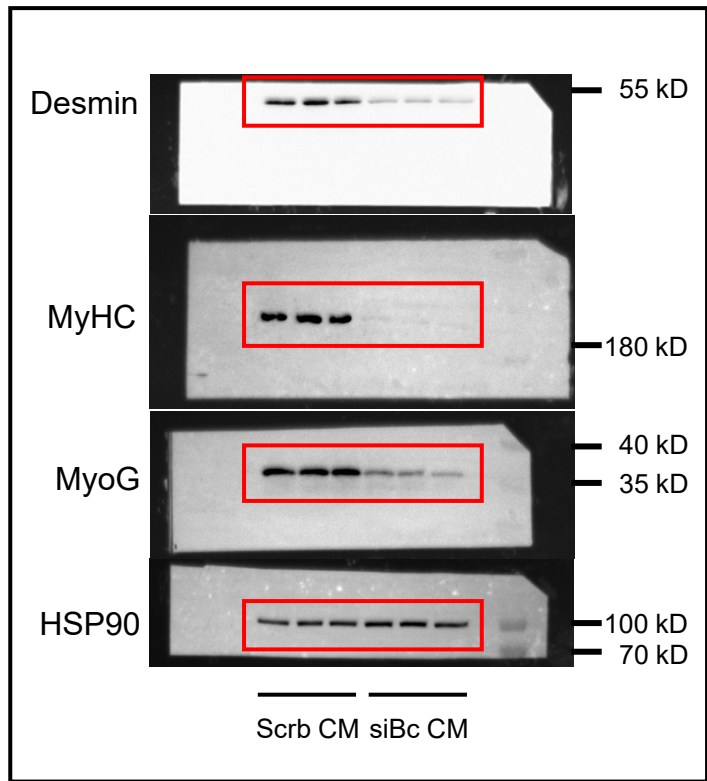

**Fig. 2g**

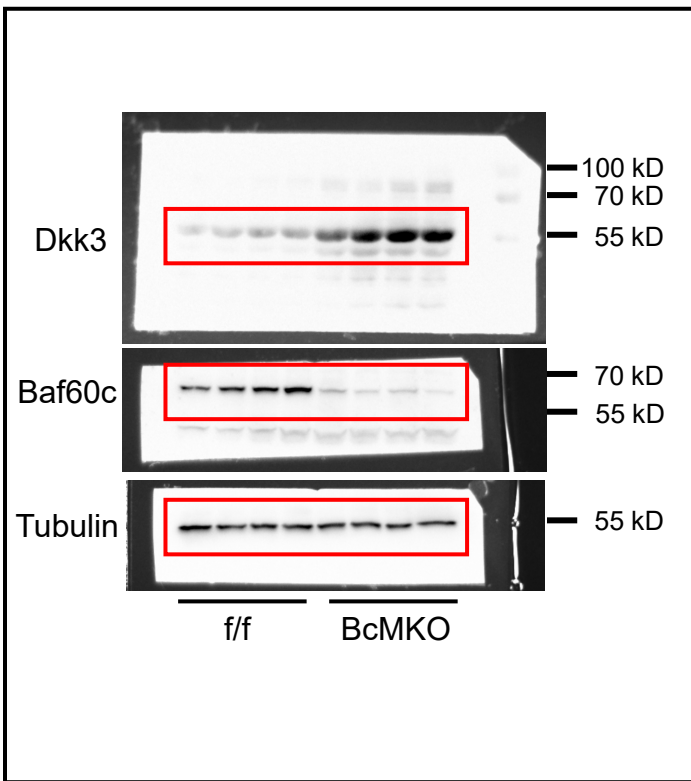

**Fig. 2h**

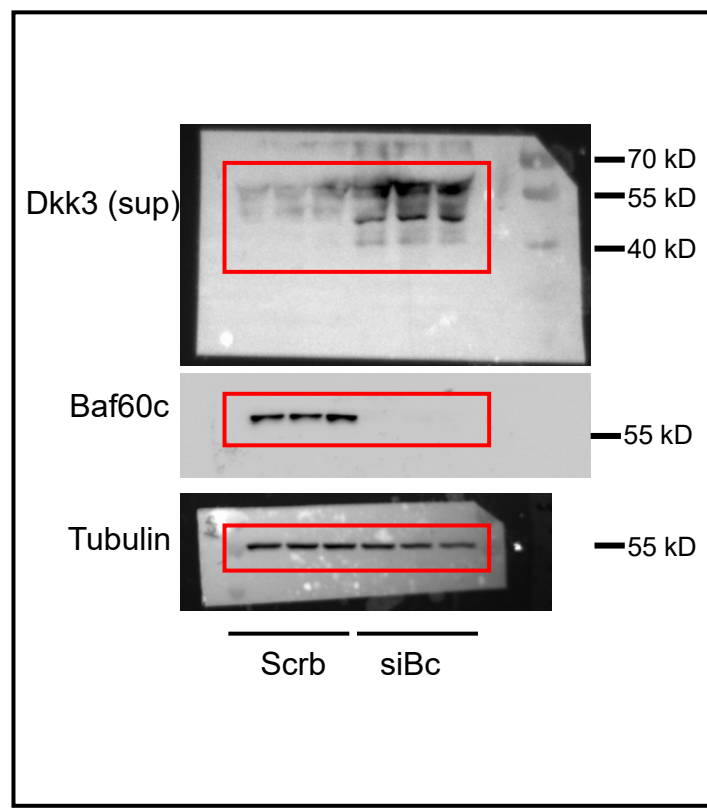

Supplement: JEM_20221123_SourceDataF2.pdf [file JEM_20221123_SourceDataF2.pdf]
