# Supplementary material for: Myofiber Baf60c controls muscle regeneration by modulating Dkk3-mediated paracrine signaling
Source: PubMed Central journal article supplement — J Exp Med. 2023 Jun 7;220(9):e20221123. doi: 10.1084/jem.20221123 (PMC10250555; doi:10.1084/jem.20221123), 2023-06-07

**Fig. 8. Elevation of Dkk3 expression in skeletal muscle contributes to the declined muscle regeneration capacity in obese and diabetic mice.**

**Fig. 8a**

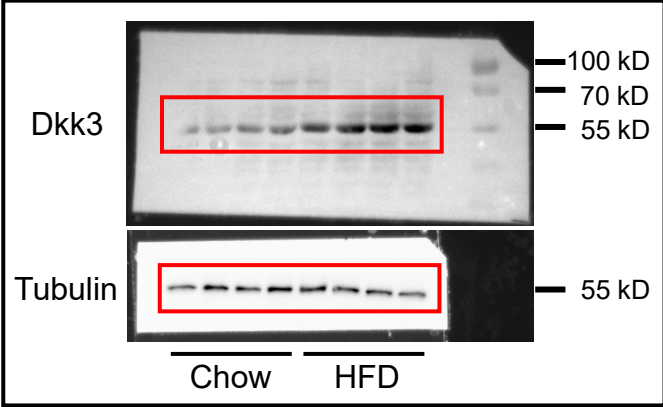

**Fig. 8b**

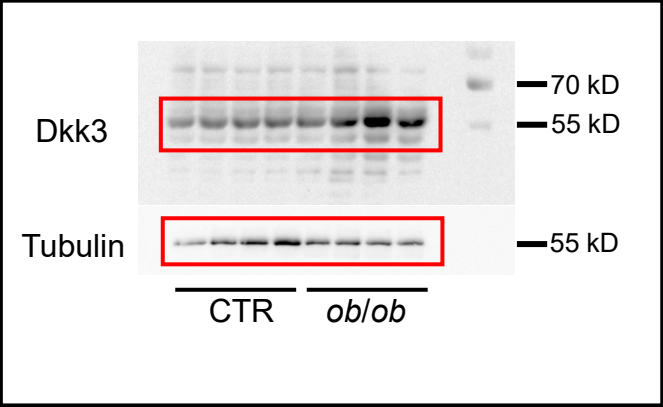

**Fig. 8c**

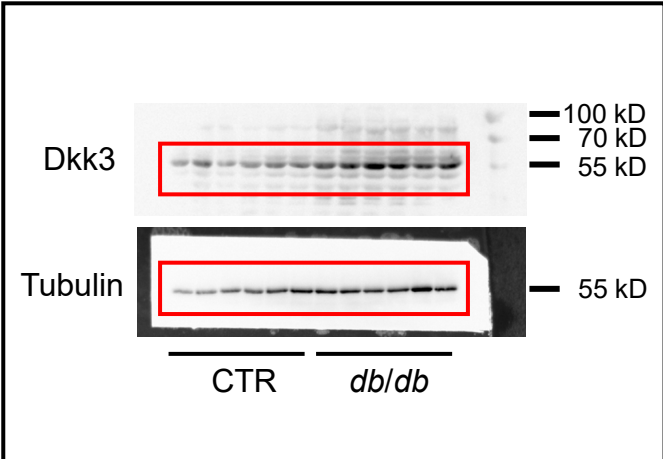

**Fig. 8d**

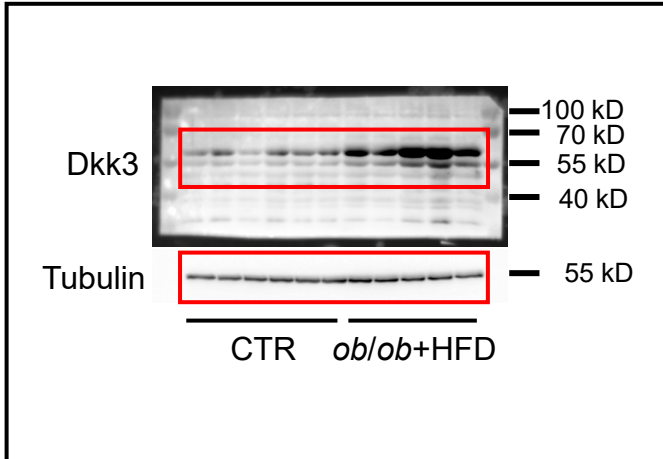

**Fig. 8h**

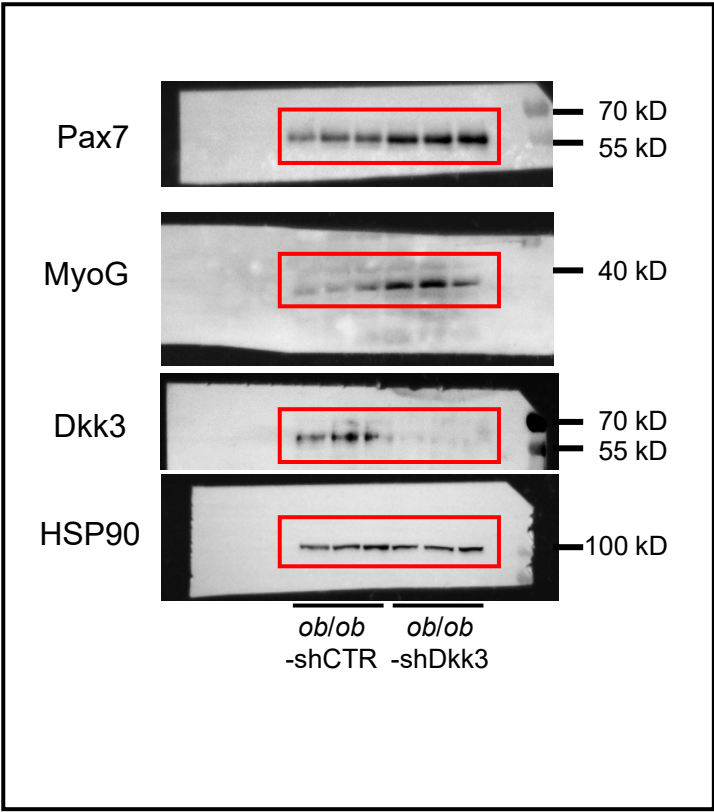

Supplement: JEM_20221123_SourceDataF8.pdf [file JEM_20221123_SourceDataF8.pdf]
