# Supplementary material for: Myofiber Baf60c controls muscle regeneration by modulating Dkk3-mediated paracrine signaling
Source: PubMed Central journal article supplement — J Exp Med. 2023 Jun 7;220(9):e20221123. doi: 10.1084/jem.20221123 (PMC10250555; doi:10.1084/jem.20221123), 2023-06-07

**Fig. S5. Effects of Baf60c-Dkk3 axis on the Akt/mTOR signaling pathway and validation of transcription factors mediating the regulation of Dkk3 expression by Baf60c in skeletal myocytes.**

**Fig. S5a**

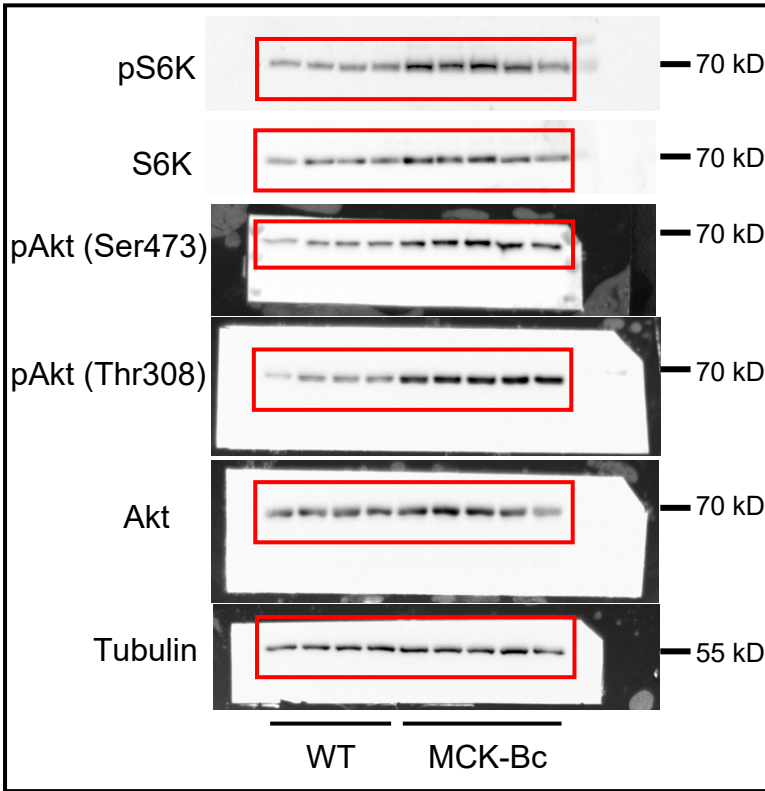

**Fig. S5b**

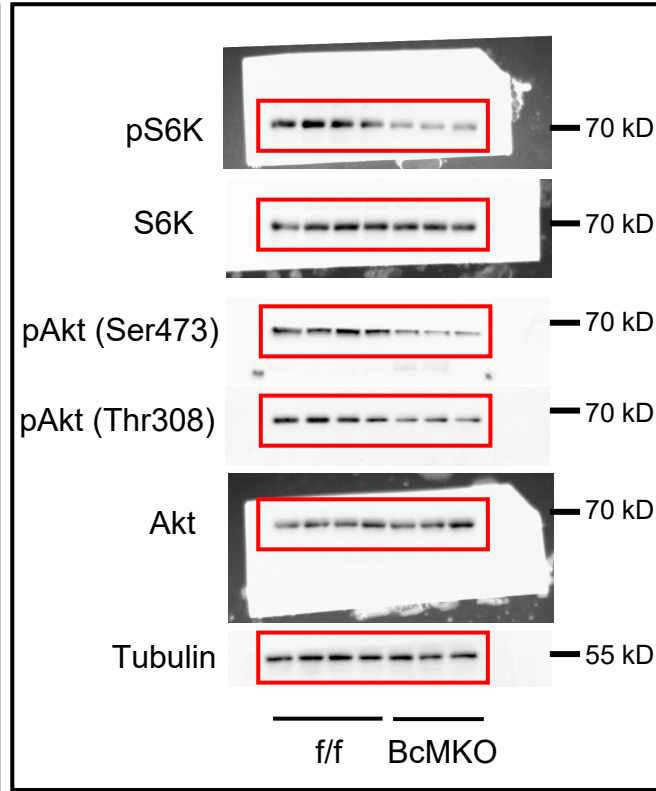

**Fig. S5c**

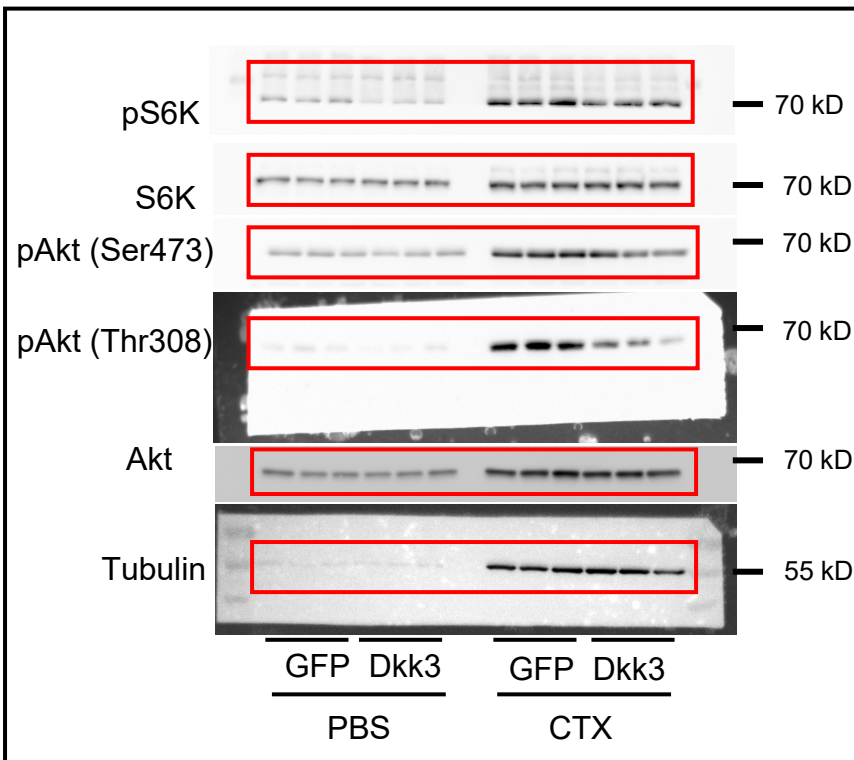

**Fig. S5d**

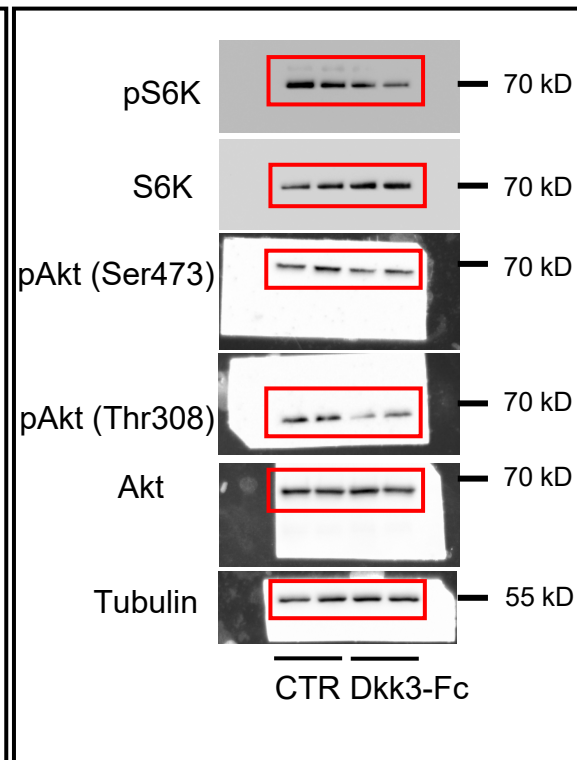

**Fig. S5e**

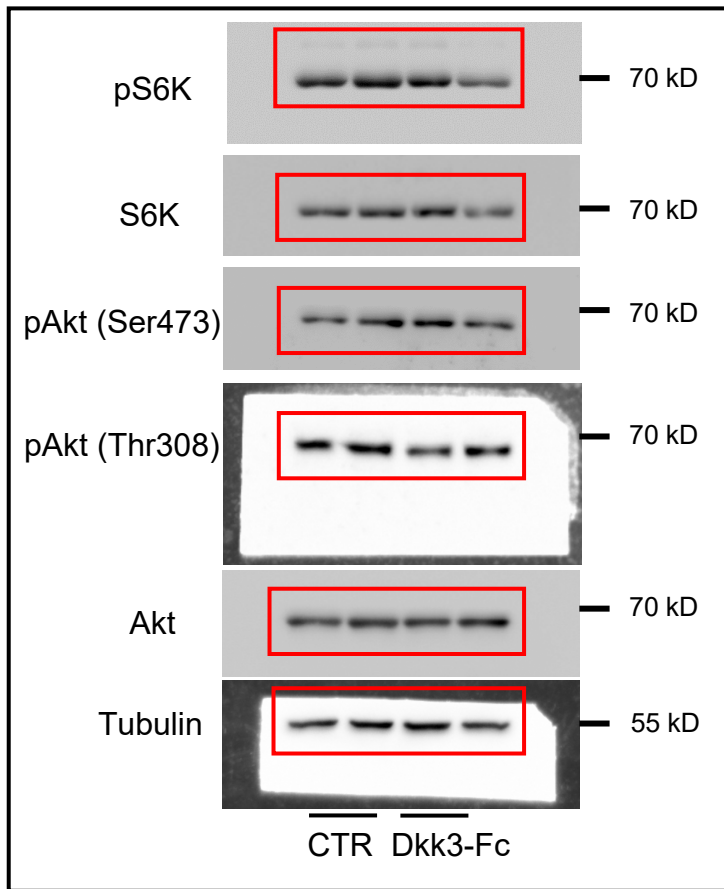

**Fig. S5g**

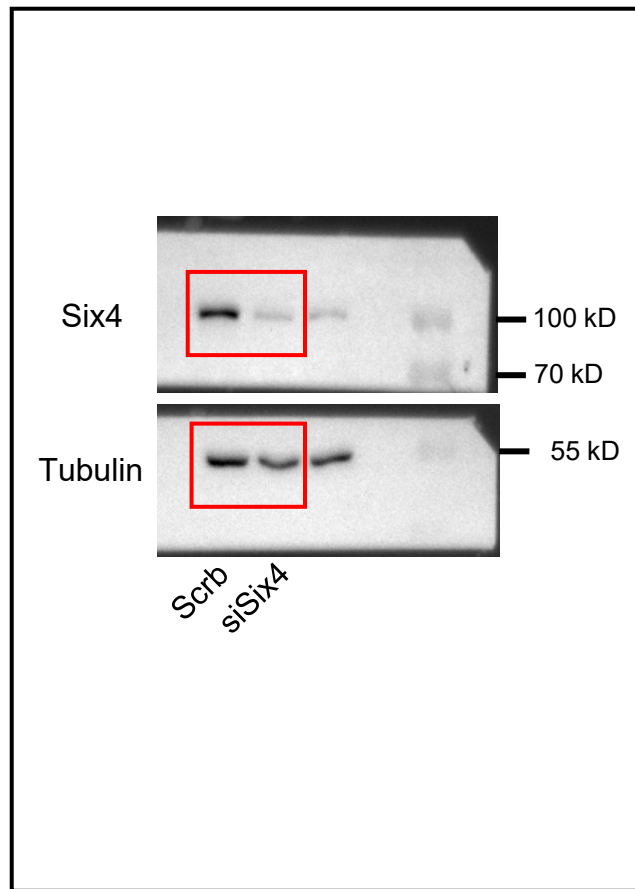

Supplement: JEM_20221123_SourceDataFS5.pdf [file JEM_20221123_SourceDataFS5.pdf]
