# Supplementary figures and images for: Myofiber Baf60c controls muscle regeneration by modulating Dkk3-mediated paracrine signaling
Source: PubMed Central journal article supplement — J Exp Med. 2023 Jun 7;220(9):e20221123. doi: 10.1084/jem.20221123 (PMC10250555; doi:10.1084/jem.20221123), 2023-06-07

**Fig. 1. Myofiber-specific inactivation of Baf60c impairs muscle regeneration.**

**Fig. 1b**

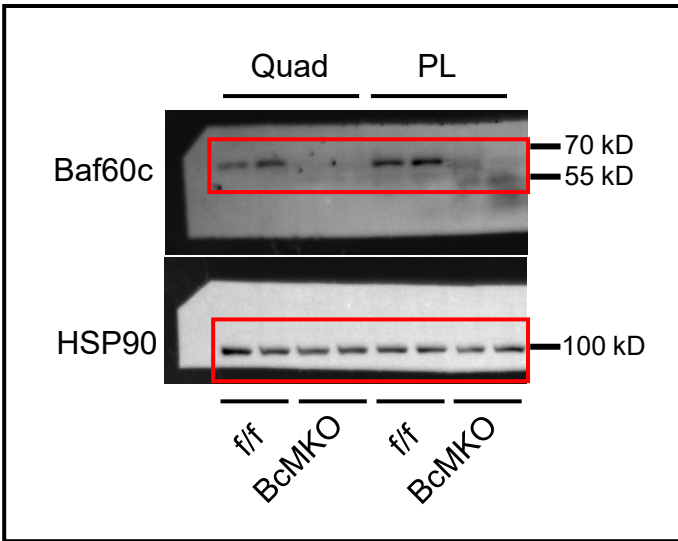

Supplement: JEM_20221123_SourceDataF1.pdf [file JEM_20221123_SourceDataF1.pdf]

**Fig. 3. Dkk3 impairs muscle regeneration in mice and in cultured myocytes.**

**Fig. 3b**

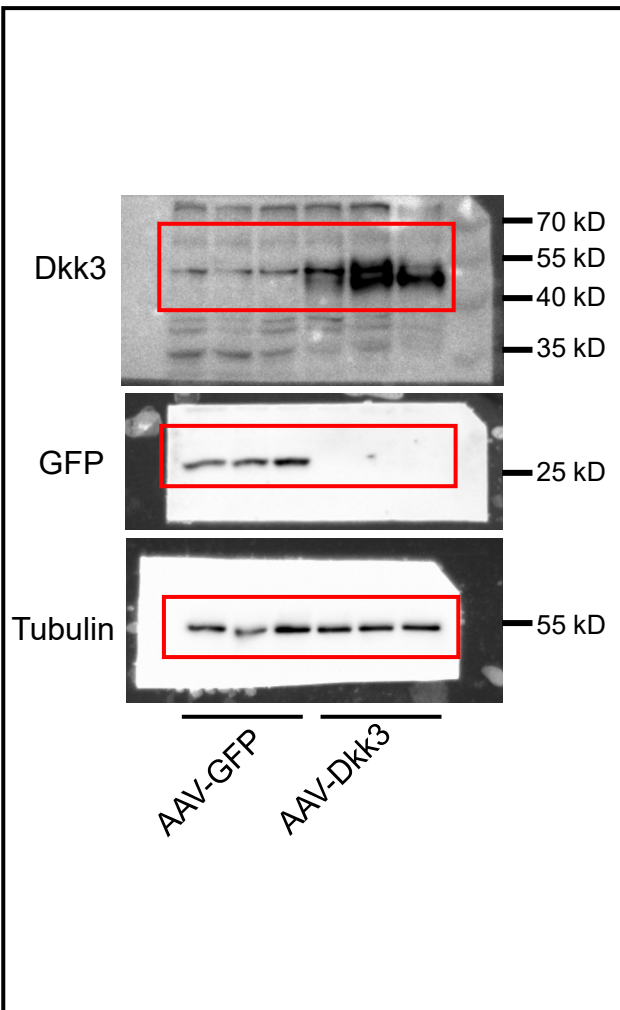

**Fig. 3f**

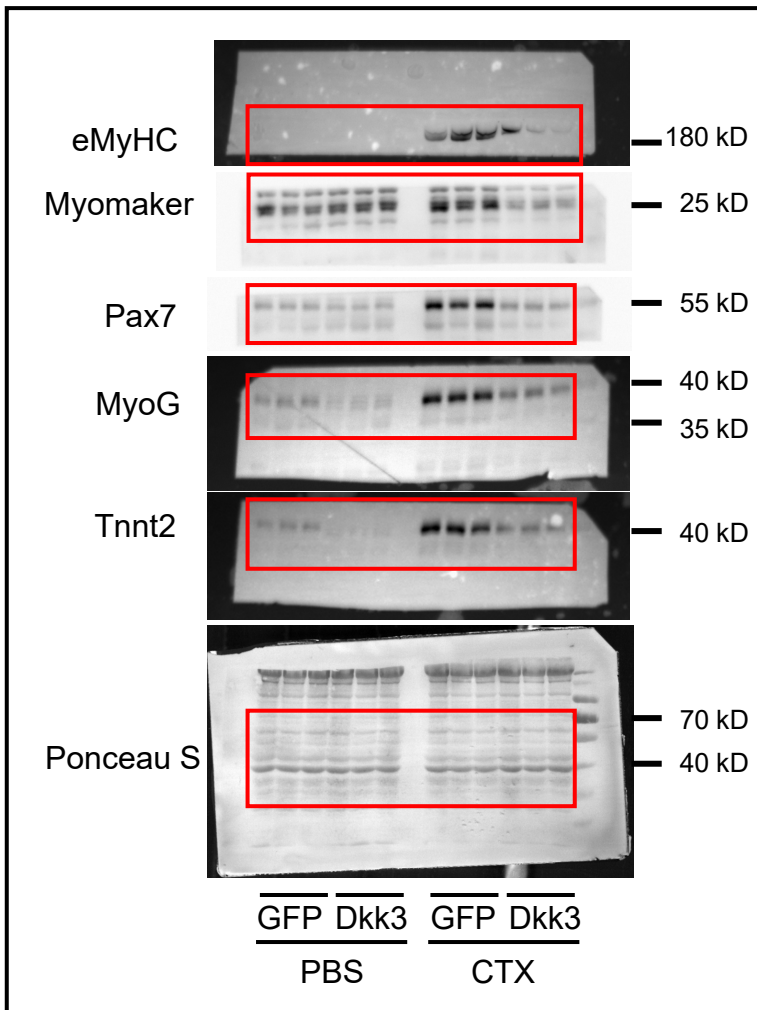

Supplement: JEM_20221123_SourceDataF3.pdf [file JEM_20221123_SourceDataF3.pdf]

**Fig. 4. Dkk3 knockdown rescues the regeneration defect in muscles from BcMKO mice.**

**Fig. 4b**

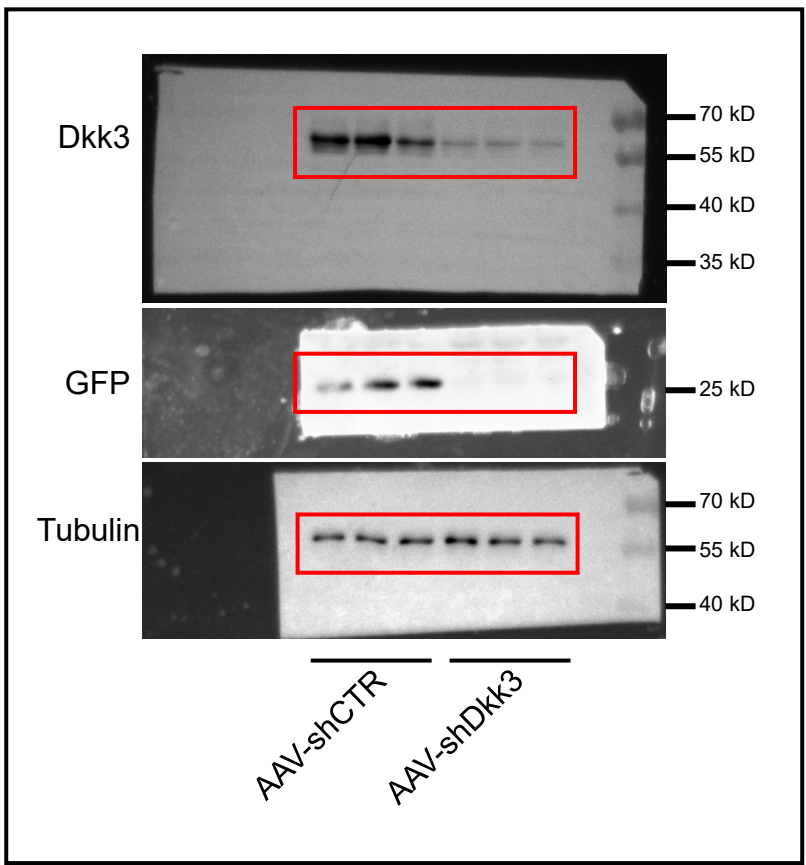

Supplement: JEM_20221123_SourceDataF4.pdf [file JEM_20221123_SourceDataF4.pdf]

**Fig. 6. Dkk3 overexpression depletes the regeneration benefits of Baf60c transgene.**

**Fig. 6e**

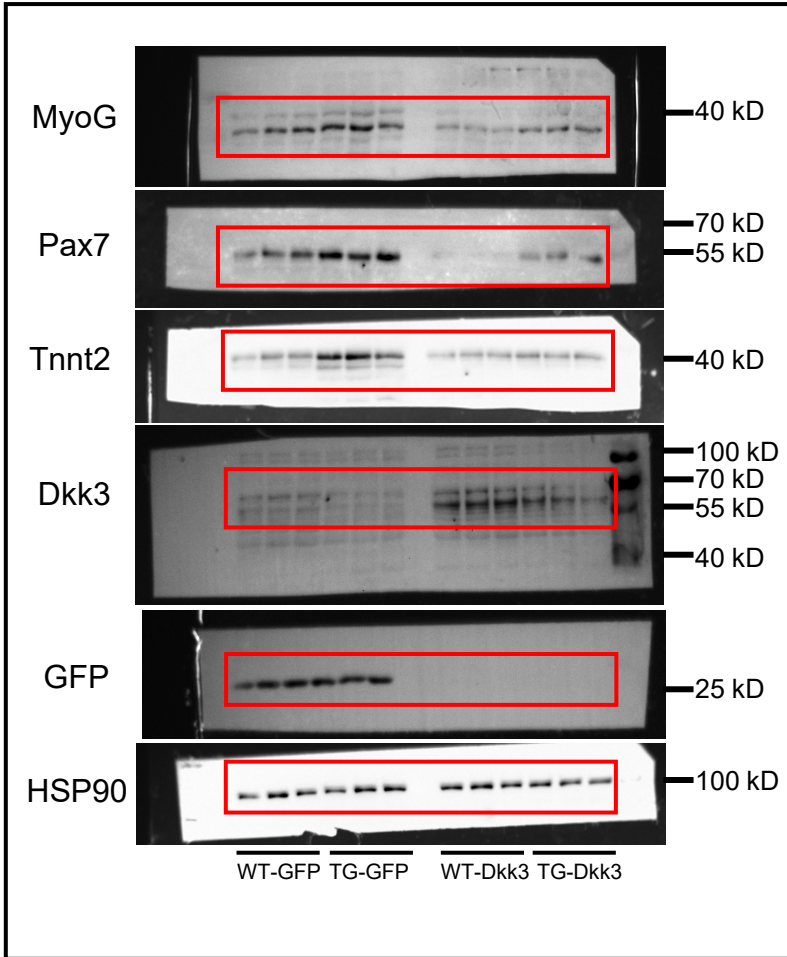

Supplement: JEM_20221123_SourceDataF6.pdf [file JEM_20221123_SourceDataF6.pdf]

**Fig. 7. Baf60c physically interacts with Six4 to regulate Dkk3 expression.**

**Fig. 7e**

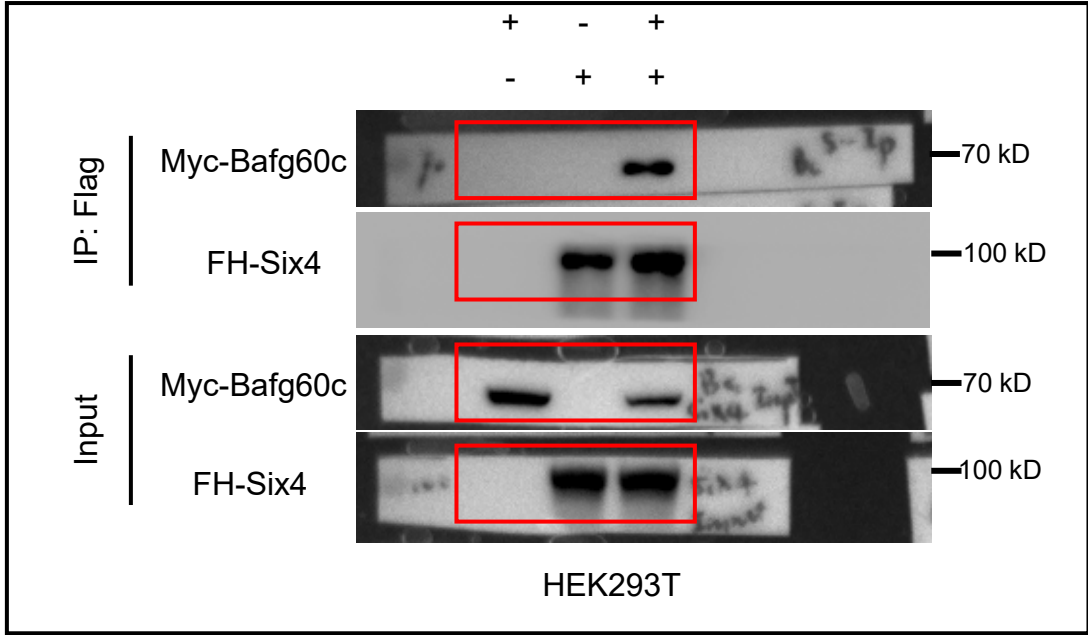

Supplement: JEM_20221123_SourceDataF7.pdf [file JEM_20221123_SourceDataF7.pdf]
